1 **Description and biology of two new egg parasitoid species,**  
2 ***Trichogramma chagres* and *T. soberania* (Hymenoptera:**  
3 **Trichogrammatidae) reared from eggs of Heliconiini**  
4 **butterflies (Lepidoptera: Nymphalidae: Heliconiinae)**  
5 **collected in Panama**

6

7 Jozef B. Woelke<sup>1,2</sup>, Viktor N. Fursov<sup>3</sup>, Alex V. Gumovsky<sup>3</sup>, Marjolein de Rijk<sup>1,4</sup>, Catalina  
8 Estrada<sup>5</sup>, Patrick Verbaarschot<sup>1</sup>, Martinus E. Huigens<sup>1,6</sup> and Nina E. Fatouros<sup>1,7</sup>

9

10 <sup>1</sup> *Laboratory of Entomology, Wageningen University & Research, P.O. Box 16, 6700 AA,*  
11 *Wageningen, The Netherlands.*

12 <sup>2</sup> *Current address: Business Unit Greenhouse Horticulture, Wageningen University &*  
13 *Research, P.O. Box 20, 2665 Z0G, Bleiswijk, The Netherlands.*

14 <sup>3</sup> *Schmalhausen Institute of Zoology of National Academy of Sciences of Ukraine, Bogdan*  
15 *Khmel'nitskiy Street 15, 01601, Kiev, Ukraine.*

16 <sup>4</sup> *Faculty of Science, Radboud University, P.O. Box 9010, 6500 GL, Nijmegen, The*  
17 *Netherlands.*

18 <sup>5</sup> *Imperial College London, Silwood Park campus, Buckhurst road, SL5 7PY, Ascot, UK.*

19 <sup>6</sup> *Current address: Education Institute, Wageningen University & Research, P.O. Box 59,*  
20 *6700 AB, Wageningen, The Netherlands.*

21 <sup>7</sup> *Current address: Biosystematics group, Wageningen University & Research, P.O. Box 16,*  
22 *6700 AA, Wageningen, The Netherlands.*

23

24 Correspondence: Jozef B. Woelke, Business Unit Greenhouse Horticulture, Wageningen  
25 University & Research, P.O. Box 20, 2665 ZG Bleiswijk, The Netherlands. Tel: (+31)317  
26 485606; email: [joop.woelke@wur.nl](mailto:joop.woelke@wur.nl).

27

28

29

30

31

32

33

34

35

36

37

38

39

40

41

42

43

44

45

46 **Abstract**

47 Two new minute egg parasitoid wasp species belonging to the genus *Trichogramma*  
48 (Hymenoptera: Trichogrammatidae), *T. chagres* sp. nov. and *T. soberania* sp. nov., were  
49 found in a tropical lowland rainforest in Panama, Central America. In this paper, we describe,  
50 illustrate and discuss the biology, morphological and molecular characterization of the two  
51 new *Trichogramma* wasp species. Both species were collected from eggs of passion vine  
52 butterflies, *Agraulis vanillae vanillae* (Lepidoptera: Nymphalidae: Heliconiinae) and  
53 unidentified Heliconiini species, laid on different *Passiflora* species (Malpighiales:  
54 Passifloraceae). A female *T. soberania* sp. nov. wasp was noted on the wings of a female  
55 *Heliconius hecale melicerta* butterfly caught in the wild. This suggests that this species may  
56 occasionally hitch a ride on adult female butterflies to find suitable host eggs. Our study adds  
57 two more species identifications to the scarce record of *Trichogramma* wasps from the  
58 widespread Heliconiini butterflies in Central America.

59

60 **Key words:** *Heliconius*, hitch-hiking, ITS-2 region of ribosomal DNA, tropical lowland  
61 rainforest, Soberania National Park, *Passiflora*.

62

63

64

65

66

67

68

69

70

71

## 72 **Introduction**

73 The Passion-vine or longwing butterflies belonging to the tribe Heliconiini (Lepidoptera:  
74 Nymphalidae: Heliconiinae), which comprise the genus *Heliconius* Kulk and related genera,  
75 are a highly diverse group of butterflies from the Neotropics (Brown 1981; Gilbert 1991;  
76 Harvey 1991; Penz and Peggie 2003). Heliconiini butterflies are important study objects to  
77 unravel the coevolution between insects and (host) plants (Brown 1981; Ehrlich and Raven  
78 1964). Passion vine or *Passiflora* (Malpighiales: Passifloraceae) plants are exclusively used as  
79 host plants for their offspring (Benson et al. 1975; Brown 1981). Eggs are typically brightly  
80 coloured and laid singly or in (small) groups on new shoots, tendrils or older leaves (Benson  
81 et al. 1975; Brown 1981).

82

83 Many nymphalid butterflies are toxic and, especially those belonging to the genus *Heliconius*,  
84 are well known model organisms for studies on Müllerian mimicry, with numerous species  
85 converging to a common wing pattern (Brown 1981; Gilbert 1991; Jiggins et al. 2004;  
86 Mavárez et al. 2006). *Heliconius* butterflies feed on pollen, which allows them to live up to  
87 six months (Gilbert 1972). Despite the well-known ecological interactions and evolutionary  
88 history of Heliconiini butterflies, only very few studies have identified some of their natural  
89 enemies to species level (Guerrieri et al. 2010; Querino and Zucchi 2002, 2003a,b; Zhang et  
90 al. 2005; Zucchi et al. 2010). We conducted a study of the egg parasitoid community of  
91 Heliconiini butterflies on *Passiflora* plants in a tropical lowland rainforest in Panama and  
92 found that most species of parasitic wasps were not yet described. Currently, only the newly  
93 found species *Ooencyrtus marcelloi* (Hymenoptera: Encyrtidae) has been described from this  
94 study (Guerrieri et al. 2010).

95

96 *Trichogramma* wasps (Hymenoptera: Trichogrammatidae) are minute ( $\pm 0.5$  mm long)  
97 gregarious egg parasitoids that are used worldwide as important biological control agents

98 against agricultural pest insects, predominantly Lepidopterans (Li 1994; Nagarkatti and  
99 Nagaraja 1977; Polaszek 2010; Smiths 1996; Stinner 1977). In addition to Lepidoptera,  
100 *Trichogramma* can occasionally also parasitize eggs of Coleoptera, Diptera, Hemiptera,  
101 Neuroptera, Megaloptera and other Hymenoptera (Nagarkatti and Nagaraja 1977; Polaszek  
102 2010).

103

104 *Trichogramma* species are considered as polyphagous parasitoids, although the level of  
105 polyphagy may differ between species (Romeis et al. 2005; Zucchi et al. 2010). They mainly  
106 use chemical information to find suitable host eggs (Fatouros et al. 2008). For example, some  
107 wasps spy on the anti-aphrodisiac pheromone emitted by mated female Pierid butterflies and  
108 hitch a ride on the latter to oviposition sites. Such a chemical-espionage-and-ride strategy has  
109 been shown to be used also by other egg parasitoid species (Fatouros et al. 2005; Huigens et  
110 al. 2010; Fatouros and Huigens 2012; Huigens and Fatouros 2013). Anti-aphrodisiac  
111 pheromones were also identified in 11 *Heliconius* species (Estrada et al. 2011). We  
112 hypothesize that *Trichogramma* wasps can also use anti-aphrodisiacs to find *Heliconius*  
113 butterflies to hitch-hike and parasitize their freshly laid eggs.

114

115 Worldwide, around 210 *Trichogramma* species have been described (Pinto 2006). The  
116 diversity of species is well-described for North America where 60 species of *Trichogramma*  
117 are recorded (Pinto 1999, Zucchi et al. 2010). In South America 41 species of *Trichogramma*  
118 are described of which most are recorded in Brazil (28 species) followed by Venezuela (13),  
119 Colombia (9) and Peru (7) (Parra and Zucchi 2004; Velasquez de Rios and Teran 1995, 2003;  
120 Querino et al. 2017; Querino and Zucchi 2003a,b, 2005; Zucchi 1988; Zucchi et al. 2010). In  
121 Central America 22 species of *Trichogramma* are recorded and among them only one species,  
122 *T. panamense* Pinto has been described from Panama (Pinto 1999), showing that our two new  
123 species are the second and third species records for this country.

124 Morphological species identification of the complex *Trichogramma* genus can be done by  
125 observing male genitalia, which are a very useful diagnostic character (Nagarkatti and  
126 Nagaraja 1971). Females are often impossible to identify to species level by morphological  
127 characteristics. Stouthamer et al. (1999) developed a molecular tool for *Trichogramma*  
128 species identification based on the Internal Transcribed Spacer ITS-2 region of ribosomal  
129 DNA that is now-a-days, together with morphology, often used for species identification.  
130 Here, we describe two new species of *Trichogramma* on the basis of species morphology with  
131 illustrations and the sequence of the ITS-2 DNA, as well as the biology of the two species.  
132 They were reared from Heliconiini eggs that were deposited on several species of *Passiflora*  
133 plants. Moreover, we monitored Heliconiini butterflies for the presence of hitch-hiking  
134 *Trichogramma* wasps.

135

## 136 **Materials and methods**

137

### 138 ***Wasp collection***

139 *Trichogramma* wasps were collected from Heliconiini eggs (Figure 1a,b) during a field survey  
140 from February until April 2008 in a tropical lowland rainforest in Soberania National Park  
141 (Parque Nacional Soberanía) (Figure 1c), and in the town of Gamboa and surroundings, in the  
142 Republic of Panama. In our research area, six *Passiflora* plant species were found: *Passiflora*  
143 *foetida* L. var. *isthmia* Killip (Figure 1d), *P. auriculata* Kunth, *P. vitifolia* Kunth (Figure 1e),  
144 *P. biflora* Lamarck (Figure 1f), *P. coriacea* Juss., and *P. menispermifolia* Kunth. Plants were  
145 labelled and checked once or twice a week for the presence of Heliconiini eggs. Eggs were  
146 put separately into small glass vials and taken to a laboratory of the Smithsonian Tropical  
147 Research Institute (STRI) in Gamboa. Eggs were checked daily for the presence of caterpillar  
148 or wasp emergence. If a caterpillar emerged, it was reared or released onto the location where  
149 the egg was collected or into STRI butterfly facilities. Parasitized eggs become black several

150 days before wasp(s) emergence and can then be differentiated from unparasitized eggs.

151 *Trichogramma* wasps were sexed upon emergence and then offered *Heliconius erato* or *H.*

152 *melpomene* and later *Mamestra brassicae* (Lepidoptera: Noctuidae) eggs to rear more

153 individuals for identification and study the wasp's biology. For detailed biological studies,

154 fresh and developing eggs of *M. brassicae* were offered to the females of each strain.

155 Behavior of oviposition was observed. Eggs were dissected on certain time intervals, so

156 details of the immature development and morphology were revealed using different stereo-

157 and upright microscopes.

158

159 Besides the collections of eggs, we also caught Heliconiini adults to check for the presence of

160 hitch-hiking wasps on their bodies. The Heliconiini species known in the research areas are

161 *Agraulis vanillae vanillae* (Figure 1g-h), *Dione juno huascuma*, *Dryas iulia moderata*,

162 *Eueides aliphaera gracilis*, *E. lybia olympia*; *Heliconius cydno chioneus*, *H. doris viridis*,

163 *H. erato petiverana*, *H. hecale melicerta* (Figure 1i-j), *H. hecalesia*, *H. ismenius*, *H.*

164 *melpomene rosina*, *H. sapho sapho*, *H. sara fulgidus* and *Philaethria dido* (Estrada and

165 Jiggins 2002; Naisbit 2001; Dr. Annette Aiello personal information). Butterflies were

166 collected with a butterfly net. Inside the net, a plastic pot attached with a rubber band was

167 placed to avoid wasp escape (as described in Fatouros and Huigens 2012). When a butterfly

168 was caught, it was cooled down to decrease its activity. After collection, all butterflies were

169 placed overnight in a refrigerator (4°C) at the STRI laboratory in Gamboa and checked the

170 next day carefully for the presence of parasitic wasps. Butterflies were fed with honey water

171 and released in the same area where they were caught.

172

173 Wasps were stored in 95% ethanol and shipped to the Schmalhausen Institute of Zoology of

174 the National Academy of Sciences, Ukraine, for morphological identification or to the

175 Laboratory of Entomology, Wageningen University and Research, The Netherlands for  
176 molecular identification.

177

### 178 ***Morphological species identification***

179 The descriptions, measurements and figures were made with the aid of an Olympus CX-40  
180 microscope. Photographs were taken using the software Olympus Capture. The terminology  
181 and abbreviations of morphological structures and ratios of male genitalia and antenna are  
182 follows Pinto (1999) and Burks and Heraty (2002). Descriptions are based on holotype and  
183 paratype male specimens, which were mounted on glass slides. The measurements of body  
184 parts were based on five male specimens for each of both species described below. Body parts  
185 were measured in micrometers ( $\mu\text{m}$ ) and summarized in the description as range followed by  
186 the mean in parenthesis (avg means average).

187 Some of the commonly used morphological terms were abbreviated as follows: length of  
188 aedeagus (AL, Figure 2a), length of basal part of aedeagus (AL-B, Figure 2a), length of dorsal  
189 aperture (DA-L), length (DLA-L, Figure 2a) and width (DLA-W, Figure 2a) of dorsal lamina  
190 (DLA), maximum width (GW, Figure 2a) or length (GL, Figure 2a) of genital capsule (GC),  
191 width of basal part of genital capsule (GW-B, Figure 2a), apical distance (AD, Figure 2a),  
192 length (IVP-L, Figure 2a) and width (IVP-W, Figure 2a) of intervorsellar process (IVP),  
193 internal length of parameres (PL, Figure 2a), length of the longest seta of flagellum (SL), and  
194 maximum width of flagellum (FW), marginal vein of fore wing (MV).

195 We calculated the ratios of (1) SL/FW; (2) GL/GW, (3) GW/GW-B, (4) DA-L/GL, (5) DLA-  
196 L/DLA-W, (6) GW/DLA-W, (7) DLA-L/GL, (8) IVP-L/IVP-W, (9) AD/IVP-L, (10) AD/GL,  
197 (11) PL/DLA-L, (12) AL/GL, and (13) AL-B/AL.

198

### 199 ***Molecular species identification based on ITS-2 gene***



200 Wasp species identification was also performed based on the ribosomal ITS-2 gene as  
201 described previously (Fatouros and Huigens 2012; Gonçalves et al. 2006; Huigens et al. 2004;  
202 Stouthamer et al. 1999).

203

#### 204 *DNA extraction*

205 From every vial, with emerged wasp(s) of one Heliconiini egg, one wasp was taken and dried  
206 on a filter paper. Every wasp was crushed separately in a 0.5 ml Eppendorf tube with a closed  
207 Pasteur pipette. After crushing, 50 µl of Chelex solution (5%) and 4 µl of proteinase K  
208 (20mg/ml) were added. Finally, the samples were incubated overnight at 56°C followed by 10  
209 min at 95°C.

210

#### 211 *PCR amplification*

212 A PCR reaction was performed for every sample. In a 0.2 ml Eppendorf tube 25 µl volume  
213 consisting of 18.43 µl of distilled water, 2.5 µl 10x PCR reaction buffer (HT Biotechnologies  
214 Ltd., Cambridge, UK), 2.5 µl DNA template, 0.5 µl dNTP (10mM), 0.5 µl forward primer  
215 (25µM), 0.5 µl reverse primer (25µM) and 0.07 µl Taq polymerase (5 units/µl) (HT  
216 Biotechnologies Ltd., Cambridge, UK) was added. To amplify the ITS-2 region the forward  
217 primer 5'-TGTGAACTGCAGGACACATG-3' and the reverse primer 5'-  
218 GTCTTGCCTGCTCTGAG-3' were used. The PCR cycling program was 3 min at 94°C, 33  
219 cycles of 40 s at 94°C, 45 s at 53°C and 45 s at 72°C, followed by 10 min at 72°C after the last  
220 cycle. PCR products were run on a 1.5% agarose gel and stained with ethidium bromide.

221

#### 222 *Cloning and sequencing*

223 Each amplified ITS-2 gene was cloned and sequenced. ITS-2 products were purified from the  
224 gel using the MinElute Gel Extraction Kit (QIAGEN GmbH, Hilden, Germany) for DNA  
225 fragment purification. The PCR fragment was ligated to a pGEM-T vector (Promega,

226 Madison, WI, USA) and transformed into *Escherichia coli* XL2blue cells (Stratagene, La  
227 Jolla, CA, USA). Correct insertion of the ITS-2 fragments was confirmed by PCR. To purify  
228 the plasmid, the GenElute Plasmid Miniprep Kit (Sigma-Aldrich Chemie GmbH, Steinheim,  
229 Germany) was used. By using an Applied Biosystems automatic sequencer the ITS-2  
230 fragments were sequenced. ITS-2 sequences were finally aligned and matched against  
231 sequences present in GenBank and those present in the large database of Prof. Dr. R.  
232 Stouthamer (University of California, Riverside, USA).

233

### 234 ***Species deposition***

235 The holotype and series of paratypes specimens of both species (mounted on glass slides) are  
236 deposited in the collection of Schmalhausen Institute of Zoology of National Academy of  
237 Sciences of Ukraine, Kiev, Ukraine (SIZK). Paratypes are deposited in the collection of  
238 Natural History Museum, London, UK (BMNH) and Naturalis Biodiversity Center, Leiden,  
239 The Netherlands (RMNH).

240

### 241 **Results**

242 In total, we collected 317 singly laid eggs of different Heliconiini species. From these 317  
243 eggs, we found 3.2% being parasitized by *Trichogramma* wasps and 1.6% per *Trichogramma*  
244 species described here. From those parasitized eggs, 33 females and 7 males of the first  
245 species (later named *T. chagres*), and 27 females and 6 males of the second species (later  
246 named *T. soberania*) emerged. We also collected eight egg clusters, with a total of 996 eggs,  
247 of the gregarious species *Dione juno*. None of the *D. juno* eggs were parasitized. Moreover,  
248 we caught 133 butterflies of the Heliconiini tribe on which we found one *Trichogramma* wasp  
249 in the net (later named *T. soberania*), which was presumably hitchhiking on the butterfly

250 body. After studying the collected materials, we conclude that both *Trichogramma* species are  
251 new to science. The descriptions are given below.

252

## 253 **Taxonomy**

254

255 Family **Trichogrammatidae** Haliday, 1851

256

Genus **Trichogramma** Westwood, 1833

257

258 *Trichogramma chagres* Fursov and Woelke, sp. nov.

259

(Figure 2 and 3)

260

## 261 **Diagnosis**

262 *Trichogramma chagres* sp. nov. is characterized by a wide GC (about 2.21–2.30 times as long  
263 as wide, Figure 2b-c), very wide DLA (Figure 2c), very long, narrow and apically sharp IVP  
264 (Figure 2b), long and sharp setae of antennae (about 1.92–2.11 times as long as width of  
265 clava, Figure 2c). The new species is morphologically close to *T. benetti* Nagaraja and  
266 Nagarkatti, *T. drepanoform* Pinto and Oatman and *T. atopovirillia* Oatman and Platner, but it  
267 is well distinguishable from them all in the possession of the distinctly long IVP (about 1.21–  
268 1.57 times as long as wide, Figure 2c), which is much shorter in the other species. Apart from  
269 the shape of IVP, *T. chagres* sp. nov. differs from *T. benetti* in having a very narrow base of  
270 GC (Figure 2b-c) (it is widened basally in *T. benetti*). The new species is distinguishable  
271 from both *T. drepanoform* and *T. benetti* in having the wide DLA being shaped as a spade  
272 with a subtriangular tip (Figure 2c) (the tip of DLA is evenly acute in both, *T. drepanoform*  
273 and *T. benetti*). Also, the tip of DLA is extended beyond the tips of vorsellar digiti in *T.*  
274 *chagres* sp. nov. (Figure 2b-c), unlike in *T. benetti*.

275

276 **Description**

277 Based on holotype and 4 paratype male specimens.

278 Color of head and antennae yellow; meso- and metasoma dark brown, except bright yellow  
279 axillae, propodeum and base of gaster. All legs yellow, except hind femora and tibiae which  
280 are dirty yellow-brownish.

281 Antenna (Figure 2d) with flagellum 5.26–6.51 (avg. 5.67) times as long as maximum width,  
282 1.92–2.11 (avg. 1.95) times as long as length of scape; SL/FW = 2.85–3.43 (avg. 3.10).

283 Number of flagellar setae 35–38 (Figure 2d).

284 GL (Figure 2b-c) 112.25–137.18 (avg. 122.73), GW 50.87–62.11 (avg. 55.50), DA-L 82.15–  
285 105.89 (avg. 90.03). DLA-L 23.62–38.29 (avg. 30.85), DLA-W 29.39–33.14 (avg. 31.66);

286 IVP-L 6.97–13.22 (avg. 8.76), IVP-W 4.62–9.90 (avg. 6.18); AD 25.51–38.86 (avg. 31.83);

287 PL 25.81–38.29 (avg. 30.80); AL-B 42.13–44.94 (avg. 44.69); AL 85.63–116.85 (avg. 97.39).

288 GC wide, with wide DLA, GL/GW = 2.21–2.30 (avg. 2.24), but very narrow at the base

289 (Figure 2b-c), widest medially or subapically (at distance of 0.53 of GL), then sharply

290 narrowed to the top, with elongated dorsal aperture. DA-L/GL = 0.70–0.78 (avg. 0.74). DLA

291 very wide, spade-shaped, without basal lobes, but with small sharp lateral-apical notches, with

292 nearly parallel lateral sides and with rounded and slightly sharpened apical part (Figure 2c),

293 extended over apical parts of parameres (Figure 2b-c). DLA-L/DLA-W = 0.81–1.18 (avg.

294 0.98). GW/DLA-W = 1.60–1.92 (avg. 1.77). DLA-L/GL = 0.47–0.50 (avg. 0.49). Apex of

295 DLA not extending beyond apical part of parameres, but extending beyond apices of vorsellar

296 digiti (Figure 2b). IVP sclerotized, large, with wide base and with sharp teeth-like apex

297 (Figure 2b). IVP-L/IVP-W = 1.21–1.57 (avg. 1.42). AD/IVP-L = 2.58–5.19 (avg. 3.76).

298 AD/GL = 0.23–0.31 (avg. 0.27). Apical part of GC narrowed gradually, without curvature.

299 Parameres extending to the apex of vorsellar digiti at a distance 1.56–2.75 (avg. 2.07) as long

300 as IVP (Figure 2b). PL/DLA-L = 0.77–1.28 (avg. 1.04). DA-L/GL = 0.71–0.78 (avg. 0.75).

301 AL/GL = 0.47–0.50 (avg. 0.49). AL-B/AL = 0.73–0.86 (avg. 0.82).

302 Wings. Fore wings transparent. MV with three large and four small setae (Figure 2e).

303

#### 304 ***Material examined***

305 **Holotype male** (SIZK), Panama, Pipeline Road, 9°08'31.8"N, 79°43'30.6"W, collected 11<sup>th</sup>

306 March 2008 from egg of Heliconiini butterfly (Lepidoptera: Nymphalidae: Heliconiinae)

307 found on *Passiflora foetida* var. *isthmia* (Malpighiales: Passifloraceae) (coll. J.B. Woelke and

308 M. de Rijk), specimen on glass slide under 2 small cover slips (genitalia under right side

309 cover slip), covered by black pen, on slide No 2019 (strain L21) (in Canada balsam).

310

311 **Paratypes** same label (all from strain L21), 1 female on slide No 2019 (SIZK); 1 male and 1

312 female on slide No 2020 (SIZK); 1 male and 1 female on slide No 2021 (RMNH); 1 male and

313 1 female on slide No 2022 (BMNH) (all in Canada balsam).

314

315 **Additional material** (SIZK) same label (strain L23, this parasitized Heliconiini egg was

316 collected on the same plant, date and location as strain L21), 5 males and 4 females on slide

317 No 1875; 3 males and 3 females on slide No 1876; 3 males and 3 females on slide No 1877; 3

318 males and 3 females on slide No 1878 (all in Canada balsam).

319 Panama, Gamboa, 9°07'05.8"N, 79°41'41.1"W, collected 3 April 2008 from egg of

320 Heliconiini butterfly (Lepidoptera: Nymphalidae: Heliconiinae) found on *P. vitifolia*

321 (Malpighiales: Passifloraceae) (coll. J.B. Woelke and M. de Rijk), strain L31 (SIZK), 3 males

322 and 2 females on slide No 1871; 3 males and 3 females on slide No 1872; 3 males and 3

323 females on slide No 1873; 5 males and 4 females on slide No 1874 (all in Canada balsam).

324

325 **Field records** Panama, Pipeline Road, 9°08'31.8"N, 79°43'30.6"W, #112, 7 females and 2

326 males collected 26 February 2008 from egg of *Agraulis vanillae vanillae* (Lepidoptera:

327 Nymphalidae: Heliconiinae) found on *Passiflora foetida* var. *isthmia* (Malpighiales:

328 Passifloraceae) (coll. J.B. Woelke and M. de Rijk);

329 Panama, Pipeline Road, 9°08'31.8"N, 79°43'30.6"W, #295 (origin of strain L21) 10 females

330 and 2 males collected 11 March 2008 from egg of Heliconiini butterfly (Lepidoptera:

331 Nymphalidae: Heliconiinae) found on *Passiflora foetida* var. *isthmia* (Malpighiales:

332 Passifloraceae) (coll. J.B. Woelke and M. de Rijk);

333 Panama, Pipeline Road, 9°08'31.8"N, 79°43'30.6"W, #300, 6 females and 1 male collected 11

334 March 2008 from egg of Heliconiini butterfly (Lepidoptera: Nymphalidae: Heliconiinae)

335 found on *Passiflora foetida* var. *isthmia* (Malpighiales: Passifloraceae) (coll. J.B. Woelke and

336 M. de Rijk);

337 Panama, Pipeline Road, 9°08'31.8"N, 79°43'30.6"W, #301 (origin of strain L23) 10 females

338 and 2 males collected 11 March 2008 from egg of Heliconiini butterfly (Lepidoptera:

339 Nymphalidae: Heliconiinae) found on *Passiflora foetida* var. *isthmia* (Malpighiales:

340 Passifloraceae) (coll. J.B. Woelke and M. de Rijk);

341 Panama, Gamboa, 9°07'05.8"N, 79°41'41.1"W, #1039 (origin of strain L31), unknown

342 number of wasps collected 3 April 2008 from egg of Heliconiini butterfly (Lepidoptera:

343 Nymphalidae: Heliconiinae) found on *P. vitifolia* (Malpighiales: Passifloraceae) (coll. J.B.

344 Woelke and M. de Rijk).

345

#### 346 **Host**

347 Wasps were reared from eggs of *Agraulis vanillae vanillae* (Figure 1g-h) and Heliconiini spp.

348 found on *Passiflora foetida* L. var. *isthmia* Killip (Figure 1d) and *P. vitifolia* Kunth (Figure

349 1e).

350

351 ***Biology***

352 Idiobiont endoparasitoid. All specimens of this species were reared from collected eggs of  
353 Heliconiini butterflies, which were deposited on *Passiflora* plants. The collected wasps had an  
354 average of  $8.25 \pm 2.06$  SD females and  $1.75 \pm 0.50$  SD males per egg and having a sex-ratio  
355 of 21.21%.

356 More specific information about strain L21 (Figure 3), L23 and L31 (Figure S1). Females  
357 actively oviposit into fresh and relatively mature host eggs (with red bands) (Figure 3a-c, S1a-  
358 b). The freshly laid parasitoid egg is about 0.08-0.09 mm long (Figure 3d, S1c), developing  
359 embryo within the egg (24 h after oviposition) is about 0.15 mm long and 0.05 mm wide (in  
360 its widest part) (Figure S1d-e). The newly hatched larva is about 0.1 mm long, with distinct  
361 head capsule bearing mandibles and three thoracic segments separated by deep constrictions,  
362 unsegmented abdomen and a caudal formation behind (Figure 3e). The mature fed-up larva is  
363 about 0.7 mm long, 0.4 mm wide, with pulsing mid gut full of consumed host yolk, with  
364 remnants of caudal bladder (membranes) behind (Figure 3f-h, S1g-h). No molts were traced  
365 during the larval development, and the mandibles of hatching and mature larvae are of the  
366 same size, about 0.01 mm long (Figure S1f).

367

368 ***Distribution***

369 Panama, tropical lowland rainforest of the Soberania National Park (Parque Nacional  
370 Soberanía) (Figure 1c), and in the town of Gamboa and surroundings.

371

372 ***Etymology***

373 The Chagres (in Spanish: *Rio Chagres*) is the largest river (193 km) in the Panama Canal's  
374 watershed. The river that is surrounding our research areas, making a sharp bend around the  
375 town of Gamboa.

376

### 377 ***Sequence analysis***

378 MegaBLAST analysis revealed that our Internal Transcribed Spacer 2 (ITS-2) sequences of *T.*  
379 *chagres* sp. nov. matched with 40% query cover and 89% identity to *T. chilotraeae* Nagaraja  
380 and Nagarkatti in GenBank. Sequence ID *T. chagres* sp. nov: MK159692.

381

382 ***Trichogramma soberania*** Fursov and Woelke, sp. nov.

383 (Figure 4 and 5)

384

### 385 ***Diagnosis***

386 *Trichogramma soberania* sp. nov. is characterized by a narrow shape of phallobase (about 2.5  
387 times as long as wide, Figure 4a-b), very narrow and apically sharp and elongated DLA  
388 (Figure 4b), long and sharp setae of antennae (about 2.5 times as long as width of clava  
389 (Figure 4c). The species is morphologically close to *T. exiquum* Pinto and Platner and *T.*  
390 *pretiosum* Riley but can be differentiated from both species by the presence of a long and very  
391 narrow IVP (2.0–3.62 times as long as wide, Figure 4a). Also, *T. soberania* sp. nov. is  
392 discernible from *T. pretiosum* in the shape of DLA (Figure 4b), which is notably narrower in  
393 the latter species.

394



395 **Description**

396 Based on holotype and 8 paratype male specimens.

397 Color of head, antennae, meso- and metasoma dark brown, except light yellow scutellum,  
398 propodeum and base of metasoma, all legs brown, eyes red.

399 Antenna (Figure 4c) with flagellum 5.40–6.19 (avg. 5.83) times as long as its maximum  
400 width, and 1.95–2.08 times (avg. 2.02) as long as length of scape; SL/FW = 2.71–3.04 (avg.  
401 3.0). Number of flagellar setae 37–44 (Figure 4a).

402 GL 112.60–158.55 (avg. 132.05), GW 35.33–61.02 (avg. 50.96); GW-B 20.46–24.58 (avg.  
403 22.54); DA-L 62.10–95.54 (avg. 76.47).

404 DLA 36.11–46.03 (avg. 43.50), width 30.08–48.35 (avg. 38.84) (Figure 4b); IVP-L 9.51–  
405 18.00 (avg. 14.70); AD 31.20–42.41 (avg. 35.60); PL 29.87–35.08 (avg. 32.82); AL-B 70.58–  
406 88.83 (avg. 75.73); AL 126.35–167.28 (avg. 144.22).

407 GC very narrow basally, widest medially or subapically, and then again sharply narrowed  
408 apically; with elongate dorsal aperture. DA-L/GL = 0.56–0.61 (avg. 0.59). GL/GW = 2.52–  
409 3.31 (avg. 2.80). GW/GW-B 1.73–2.49 (avg. 2.26). DLA sharply narrowed medially and  
410 smoothly narrowed apically, subtriangular, with distinct basal lobes, small sharp lateral  
411 notches, and with smoothly rounded apical part (Figure 4b). Basal lobes of DLA not extended  
412 to lateral sides of GC. Apex of DLA not extended beyond apical part of parameres, but  
413 extended beyond the apex of volsellae and volsellar digiti, as well as beyond the apex of IVP  
414 (Figure 4a-b). Apex of DLA narrower than width of aedeagus (Figure 4b). DLA-L/DLA-W =  
415 0.29–0.40 (avg. 0.34). GW/DLA-W = 1.24–1.75 (avg. 1.41). DLA-L/GL 0.40–0.56 (avg.  
416 0.34). IVP sclerotized on both lateral sides, long, with wide base and with very narrow awl-  
417 like sharpened apex (Figure 4a). IVP not extended beyond the apex of volsellar digiti, and  
418 beyond the apex of DLA. IVP-L/IVP-W = 2.0–3.62 (avg. 2.57). AD/IVP-L = 2.03–3.76 (avg.  
419 2.42). AD/GL = 0.27–0.42 (avg. 0.31). Apical part of GC narrowed gradually, without

420 curvature (Figure 4a-b). PL/DLA-L 0.63–0.73 (avg. 0.72). AL/GL = 1.04–1.09 (avg. 1.07).

421 AL-B/AL = 0.48–0.56 (avg. 0.53).

422 Wings. Fore wings transparent, MV with four large and four small setae (Figure 4d).

423

#### 424 ***Material examined***

425 **Holotype male** (SIZK), Panama, Pipeline Road, 9°08'31.8"N, 79°43'30.6"W, collected 4<sup>th</sup>

426 March 2008 from egg of Heliconiini butterfly (Lepidoptera: Nymphalidae: Heliconiinae)

427 found on *Passiflora foetida* var. *isthmia* (Malpighiales: Passifloraceae) (coll. J.B. Woelke and

428 M. de Rijk), specimen on glass slide under 3 small cover slip (genitalia under right left side

429 cover slip), covered by black pen, on slide No 2023 (strain L20) (in Canada balsam).

430

431 **Paratypes** same label (all from strain L20), 1 male on slide No 2024 (SIZK); 1 male and 1

432 female on slide No 2025 (SIZK); 1 male and 1 female on slide No 2026 (SIZK); 1 male and 1

433 female on slide No 2027 (RMNH); 1 male and 1 female on slide No 2031 (BMNH); 1 male

434 on slide No 2028 (SIZK); 1 male on slide No 2029 (SIZK); 1 male on slide No 2030 (SIZK)

435 (all in Canada balsam).

436

437 **Additional material** (SIZK) same label (strain L20), 3 males and 1 female on slide No 1867;

438 3 males and 3 females on slide No 1868; 3 males and 2 females on slide No 1869; 3 males

439 and 3 females on slide No 1870 (all in Canada balsam).

440

441 **Field records** Panama, Pipeline Road, 9°08'31.8"N, 79°43'30.6"W, #105, 7 females and 1

442 male collected 26 February 2008 from egg of *Agraulis vanillae vanillae* (Lepidoptera:

443 Nymphalidae: Heliconiinae) found on *Passiflora foetida* var. *isthmia* (Malpighiales:  
444 Passifloraceae) (coll. J.B. Woelke and M. de Rijk);  
445 Panama, Pipeline Road, 9°08'31.8"N, 79°43'30.6"W, #168, 10 females and 1 male collected 4  
446 March 2008 from egg of Heliconiini butterfly (Lepidoptera: Nymphalidae: Heliconiinae)  
447 found on *Passiflora foetida* var. *isthmia* (Malpighiales: Passifloraceae) (coll. J.B. Woelke and  
448 M. de Rijk);

449 Panama, Pipeline Road, 9°08'31.8"N, 79°43'30.6"W, #180 (origin of strain L20), 2 females  
450 and 1 male collected 4 March 2008 from egg of Heliconiini butterfly (Lepidoptera:  
451 Nymphalidae: Heliconiinae) found on *Passiflora foetida* var. *isthmia* (Malpighiales:  
452 Passifloraceae) (coll. J.B. Woelke and M. de Rijk);

453 Panama, Plantation Road, 9°04'32.1"N, 79°39'32.3"W, #283, 5 females and 2 males collected  
454 6 March 2008 from egg of Heliconiini butterfly (Lepidoptera: Nymphalidae: Heliconiinae)  
455 found on *Passiflora biflora* (Malpighiales: Passifloraceae) (coll. J.B. Woelke and M. de Rijk);

456 Panama, Pipeline Road, 9°08'31.8"N, 79°43'30.6"W, #346, 2 females and 1 male collected 20  
457 March 2008 from egg of *Agraulis vanillae vanillae* (Lepidoptera: Nymphalidae: Heliconiinae)  
458 found on *Passiflora foetida* var. *isthmia* (Malpighiales: Passifloraceae) (coll. J.B. Woelke and  
459 M. de Rijk).

460

461 **Hitch-hiking record** Panama, Pipeline Road, 9°08'31.8"N, 79°43'30.6"W, #32, 1 female  
462 wasp was collected on a female *Heliconius hecale melicerta* butterfly, 12 February 2008 (coll.  
463 J.B. Woelke and M. de Rijk).

464

465 *Host*

466 Wasps were reared from eggs of *Agraulis vanillae vanillae* (Figure g-h) and Heliconiini spp.  
467 found on *Passiflora biflora* Lamarck (Figure 1f) and *P. foetida* L. var. *isthmia* Killip (Figure  
468 1d).

469

## 470 **Biology**

471 Idiobiont endoparasitoid. All specimens of this species were reared of collected eggs of  
472 Heliconiini butterflies, which were deposited on *Passiflora* plants. The collected wasps had an  
473 average of  $5.20 \pm 3.42$  SD females and  $1.20 \pm 0.45$  SD males per egg and having a sex-ratio  
474 of 23.08%. Our finding of one female wasp on an adult female *Heliconius hecale melicerta*  
475 butterfly (Figure 1i-j) suggests that this species may occasionally hitch a ride on adult female  
476 butterflies to find suitable host eggs.

477 More specific information about strain L20. Female wasps oviposit several eggs into a *M.*  
478 *brassicae* host of various ages (fresh and mature with red stripes) (Figure 5a-b). Both winged  
479 and brachypterous females oviposit. Freshly laid egg is ovoid, about 0.12 mm long, and ~  
480 0.06 mm wide (Figure 5c). About 24 h after, an embryo is traceable within the egg. The  
481 freshly hatched larva is about as long as the egg, with poorly sclerotized mandibles. 48 h later  
482 the larva is already measured 0.4-0.6 mm long, has distinct mid gut full of consumed host  
483 yolk (Figure 5d). About 50 h after oviposition the entire egg is consumed, and larvae reach  
484 nearly their final size. Up to 14 larvae can develop in same egg of *M. brassicae* (Figure 5e)  
485 The fully-grown larva is about 0.7-0.8 mm long, swollen, with full mid gut; occasionally it is  
486 reddish with white spots (Figure 5f). No molt or changes in mandible size were traced during  
487 the larval development. The male and female pupae differ in size and colour pattern (Figure  
488 5g). Host eggs turn black after consumption, likewise in case of parasitism by most  
489 *Trichogramma* species (Figure 5h).

490

491 ***Distribution***

492 Panama, tropical lowland rainforest of the Soberania National Park (Parque Nacional  
493 Soberanía) (Figure 1c), and in the town of Gamboa and surroundings.

494

495 ***Etymology***

496 Research was conducted in Soberania National Park (in Spanish: *Parque Nacion Soberanía*)  
497 in Panama, as well in the town of Gamboa, which is located in this park. The park is protected  
498 since 1980 and covers 220 km<sup>2</sup> of tropical lowland rainforest.

499

500 ***Sequence analysis***

501 MegaBLAST analysis revealed that our Internal Transcribed Spacer 2 (ITS-2) sequences of *T.*  
502 *soberania* sp. nov. matched with 37% query cover and 93% identity to *T. chilotraeae* in  
503 GenBank. Sequence ID *T. soberania* sp. nov: MK159692.

504

505 ***Acknowledgements***

506 From February until April 2008 all wasp material was collected using permit no. SE/AP-3-08  
507 and exported using permit nos. SEX/A-19-08 and SEX/A-32-08. All permits were provided  
508 by the Autoridad Nacional del Ambiente (ANAM) of Panama. We are grateful to Annette  
509 Aiello and Chris Jiggins for supporting the field survey, and Yde Jongema, John Pinto and  
510 Richard Stouthamer for their help in the early stages of wasp identifications. AG would like to  
511 thank Martijn Bezemer and Jeff Harvey for their support and advice provided throughout his  
512 stay at NIOO-KNAW and Wageningen University & Research.

513

514 **Disclosure statement**

515 No potential conflict of interest was reported by the authors.

516

517 **Funding**

518 This research was financially supported by the Netherlands Organisation for Scientific  
519 Research/Earth and Life Sciences (NWO/ALW-VENI grant 86305020 to M.E.H.), the  
520 German Research Foundation (FA 824/1-11 to N.E.F.), the Smithsonian Tropical Research  
521 Institute (STRI) short-term fellowship (to J.B.W.), the section of Integrative Biology,  
522 University of Texas, Austin travel grant (to C.E), and the C.T. de Wit Graduate School for  
523 Production Ecology and Resource Conservation visiting scientist grant 2010 (to A.G.).

524

525 **References**

526 Benson WW, Brown Jr. KS, Gilbert LE 1975. Coevolution of plants and herbivores: passion  
527 flower butterflies. *Evolution*. 29:659-680.

528

529 Brown Jr. KS 1981. The biology of *Heliconius* and related genera. *Annu Rev Entomol*.  
530 26:427-456.

531

532 Burks R, Heraty JM 2002. Morphometric analysis of four species of *Trichogramma*  
533 Westwood (Hymenoptera: Trichogrammatidae) attacking codling moth and other Tortricid  
534 pests in North America. *J Hym Res*. 11:167-187.

535

536 Ehrlich PR, Raven PH 1964. Butterflies and plants: a study in coevolution. *Evolution*. 18:586-  
537 608.

538

- 539 Estrada C, Jiggins CD 2002. Patterns of pollen feeding and habitat preference among  
540 *Heliconius* species. Ecol Entomol. 27:448-456.  
541
- 542 Estrada C, Schulz S, Yildizhan S, Gilbert LE 2011. Sexual selection drives the evolution of  
543 antiaphrodisiac pheromones in butterflies. Evolution. 65:2843-2854.  
544
- 545 Fatouros NE, Huigens ME 2012. Phoresy in the field: natural occurrence of *Trichogramma*  
546 egg parasitoids on butterflies and moths. BioControl. 57:493-502.  
547
- 548 Fatouros NE, Huigens ME, van Loon JJA, Dicke M, Hilker M 2005. Chemical  
549 communication butterfly anti-aphrodisiac lures parasitic wasps. Nature. 433:704.  
550
- 551 Fatouros NE, Dicke M, Mumm R, Meiners T, Hilker M 2008. Foraging behavior of egg  
552 parasitoids exploiting chemical information. Behav Ecol. 19:677-689.  
553
- 554 Gilbert LE 1972. Pollen feeding and reproductive biology of *Heliconius* butterflies. Proc Natl  
555 Acad Sci USA. 69:1403-1407.  
556
- 557 Gilbert LE 1991. Biodiversity of a Central American *Heliconius* community: pattern, process,  
558 and problems. In: Price PW, Lewinsohn TM, Fernandes GW, Benson WW. editors. Plant-  
559 animal interactions: evolutionary ecology in tropical and temperate regions. New York (NY):  
560 John Wiley & Sons Inc. pp.403-427.  
561
- 562 Gonçalves CI, Huigens ME, Verbaarschot P, Duarte S, Mexia A, Tavares J 2006. Natural  
563 occurrence of *Wolbachia*-infected and uninfected *Trichogramma* species in tomato fields in  
564 Portugal. Biol Control. 37:375-381.

565

566 Guerrieri E, Huigens ME, Estrada C, Woelke JB, de Rijk M, Fatouros NE, Aiello A, Noyes  
567 JS 2010. *Ooencyrtus marcelloi* sp. nov. (Hymenoptera: Encyrtidae), an egg parasitoid of  
568 Heliconiini (Lepidoptera: Nymphalidae: Heliconiinae) on passion vines (Malpighiales:  
569 Passifloraceae) in Central America. J Nat Hist. 44:81-87.

570

571 Harvey DJ 1991. Higher classification of the Nymphalidae, Appendix B. *In*: Nijhout HF,  
572 editors. The development and evolution of butterfly wing patterns. Washington  
573 DC:Smithsonian Institution Press, pp.255-273.

574

575 Huigens ME, de Almeida RP, Boons PAH, Luck RF, Stouthamer R 2004. Natural  
576 interspecific and intraspecific horizontal transfer of parthenogenesis-inducing *Wolbachia* in  
577 *Trichogramma* wasps. P Roy Soc Lond B. 271:509-515.

578

579 Huigens ME, Fatouros NE 2013. A hitch-hiker's guide to parasitism: The chemical ecology of  
580 phoretic insect parasitoids. *In*: Wajnberg E, Colazza S. editors. Chemical Ecology of Insect  
581 Parasitoids West Sussex: John Wiley & Sons Inc. pp.86-111.

582

583 Huigens ME, Woelke JB, Pashalidou FG, Bukovinszky T, Smid HM, Fatouros NE 2010.  
584 Chemical espionage on species-specific butterfly anti-aphrodisiacs by hitchhiking  
585 *Trichogramma* wasps. Behav Ecol. 21:470-478.

586

587 Jiggins CD, Estrada C, Rodrigues A 2004. Mimicry and the evolution of premating isolation  
588 in *Heliconius melpomene* Linnaeus. J Evol Biol. 17:680-691.

589



590 Li LY 1994. Worldwide use of *Trichogramma* for biological control on different crops: a  
591 survey. In: Wajnberg E, Hassan SA, editors. Biological control with egg parasitoids.  
592 Wallingford: CAB International. pp.37-53.  
593  
594 Mavárez J, Salazar CA, Bermingham E, Salcedo C, Jiggins CD, Linares M 2006. Speciation  
595 by hybridization in *Heliconius* butterflies. Nature. 441:868-871.  
596  
597 Nagarkatti S, Nagaraja H 1971. Redescriptions of some known species of *Trichogramma*  
598 (Hym., Trichogrammatidae), showing the importance of the male genitalia as a diagnostic  
599 character. B Entomol Res. 61:13-31.  
600  
601 Nagarkatti S, Nagaraja H 1977. Biosystematics of *Trichogramma* and *Trichogrammatoidea*  
602 species. Annu Rev Entomol. 22:157-176.  
603  
604 Naisbit RE 2001. Ecological divergence and speciation in *Heliconius cydno* and *H.*  
605 *melpomene*. PhD thesis, University College London, UK.  
606  
607 Parra JRP, Zucchi RA 2004. *Trichogramma* in Brazil: feasibility of use after twenty years of  
608 research. Neotrop Entomol. 33:271-284.  
609  
610 Penz CM, Peggie D 2003. Phylogenetic relationships among Heliconiinae genera based on  
611 morphology (Lepidoptera: Nymphalidae). Syst Entomol. 28:451-479.  
612  
613 Pinto JD 1999. Systematics of the North American species of *Trichogramma* Westwood  
614 (Hymenoptera: Trichogrammatidae). Mem Entomol Soc Wash. 22:1-287.  
615

- 616 Pinto JD 2006. A review of the New World genera of Trichogrammatidae (Hymenoptera). J  
617 Hymenopt Res. 15:38-163.  
618
- 619 Polaszek A 2010. Species diversity and host associations of *Trichogramma* in Eurasia. In:  
620 Consoli FL, Parra JRP, Zucchi RA editors. Egg parasitoids in agroecosystems with emphasis  
621 on *Trichogramma*. Dordrecht: Springer. pp.237-266.  
622
- 623 Querino RB, Zucchi RA 2002. Intraspecific variation in *Trichogramma bruni* Nagaraja, 1983  
624 (Hymenoptera: Trichogrammatidae) associated with different hosts. Braz J Biol. 62:665-679.  
625
- 626 Querino RB, Zucchi RA 2003a. Six new species of *Trichogramma* Westwood (Hymenoptera:  
627 Trichogrammatidae) from a Brazilian forest reserve. Zootaxa.134:1-11.  
628
- 629 Querino RB, Zucchi RA 2003b. New species of *Trichogramma* Westwood (Hymenoptera:  
630 Trichogrammatidae) associated with lepidopterous eggs in Brazil. Zootaxa. 163:1-10.  
631
- 632 Querino RB, Zucchi RA 2005. An illustrated key to the species of *Trichogramma*  
633 (Hymenoptera: Trichogrammatidae) of Brazil. Zootaxa. 1073:37-60.  
634
- 635 Querino RB, Mendes JV, Costa VA, Zucchi RA 2017. New species, notes and new record of  
636 *Trichogramma* Westwood (Hymenoptera: Trichogrammatidae) from a Brazilian forest  
637 reserve. Zootaxa. 4232:137-143.  
638
- 639 Romeis J, Babendreier D, Wäckers FL, Shanower TG 2005. Habitat and plant specificity of  
640 *Trichogramma* egg parasitoids - underlying mechanisms and implications. Basic Appl. Ecol.  
641 6:215-236.

642

643 Smith SM 1996. Biological control with *Trichogramma*: advances, successes, and potential of  
644 their use. *Annu Rev Entomol.* 41:375-406.

645

646 Stinner RE 1977. Efficacy of inundative releases. *Annu Rev Entomol.* 22:515-531.

647

648 Stouthamer R, Hu J, van Kan FJPM, Platner GR, Pinto J 1999. The utility of internally  
649 transcribed spacer 2 DNA sequences of the nuclear ribosomal gene for distinguishing sibling  
650 species of *Trichogramma*. *Biocontrol.* 43:421-440.

651

652 Velasquez de Rios M, Teran J, 1995. Description of the species of the *Trichogramma* genus  
653 (Hym., Trichogrammatidae) in Venezuela. *Colloques de l'INRA.* 73:41-46.

654

655 Velasquez de Rios M, Teran J, 2003. The *Trichogramma* species (Hymenoptera:  
656 Trichogrammatidae) of north-eastern Guarico State, Venezuela. *Entomotropica.* 18:127-146  
657 (in Spanish).

658

659 Zhang YZ, Li W, Huang DW, 2005. A taxonomic study of Chinese species of *Ooencyrtus*  
660 (Insecta: Hymenoptera: Encyrtidae). *Zool Stud.* 44:347-360.

661

662 Zucchi RA 1988. New species of *Trichogramma* (Hym., Trichogrammatidae) associated with  
663 sugar cane border *Diatraea saccharalis* (F.) (Lep. Pyralidae) in Brazil. *Colloques de l'INRA.*  
664 43:133-140.

665

666 Zucchi RA, Querino RB, Monteiro RC 2010. Diversity and hosts of *Trichogramma* in the  
667 New World, with emphasis in South America. *In: Consoli FL, Parra JRP, Zucchi RA editors.*

668 Egg parasitoids in agroecosystems with emphasis on *Trichogramma*. Dordrecht: Springer.

669 pp.219-236.

670

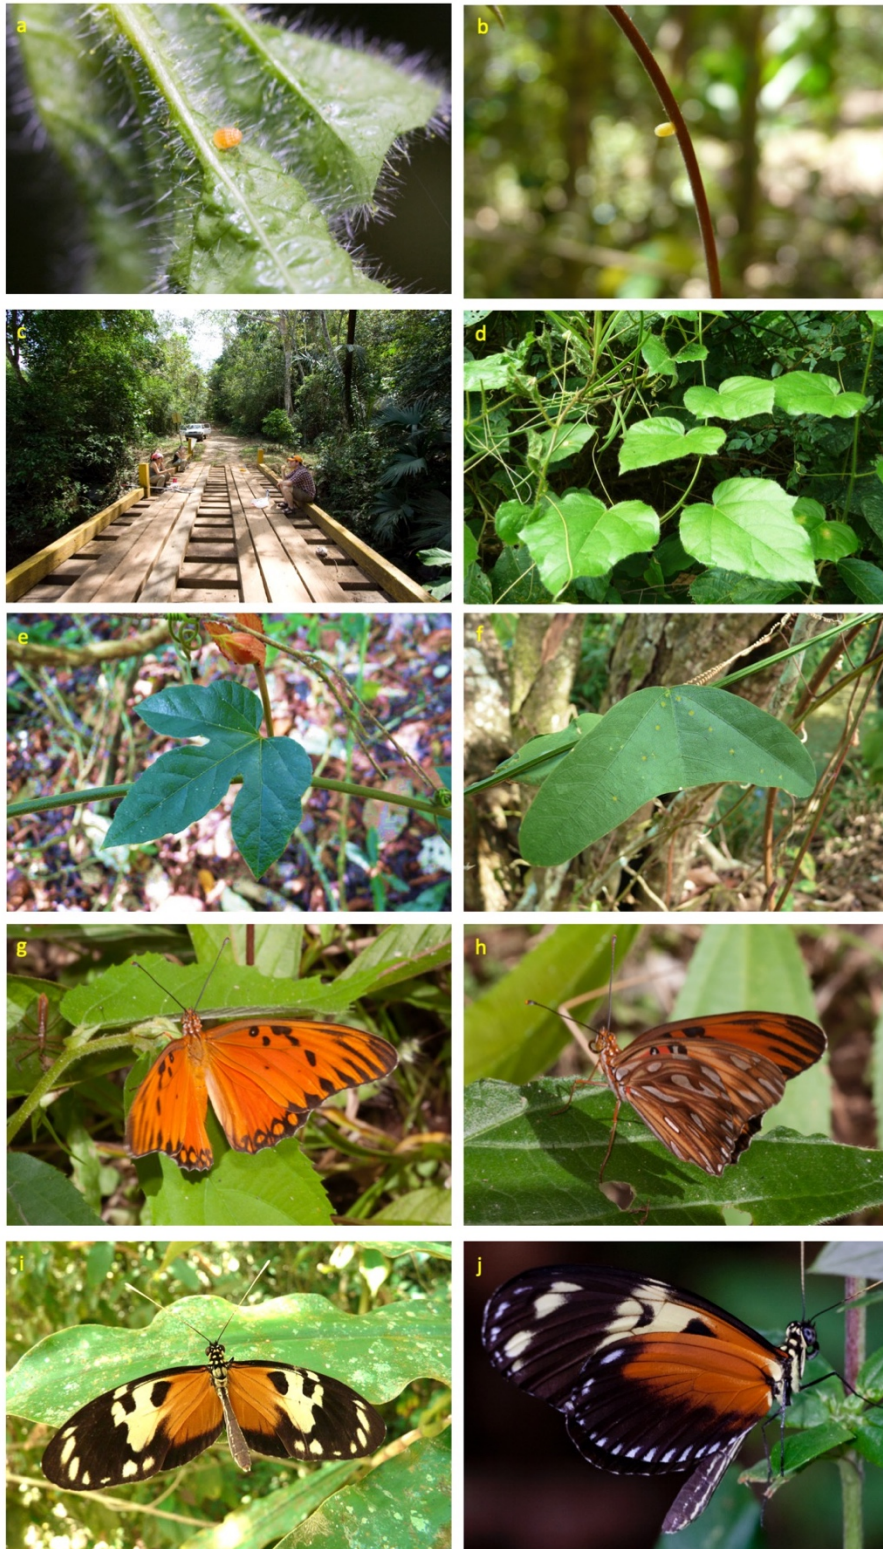

671

672 **Figure 1.** (a) Heliconiini egg on a new shoot of *Passiflora foetida* var. *isthmia*; (b)  
673 Heliconiini egg on tendril of *P. vitifolia*; (c) field site, pipeline road in Soberania National  
674 Park; (d) *Passiflora foetida* var. *isthmia* on which both new *Trichogramma* species were  
675 found from Heliconiini eggs; (e) *Passiflora vitifolia* on which *T. chagres* sp. nov. was found

676 from a Heliconiini egg; (f) *Passiflora biflora* on which *T. soberania* sp. nov. was found from  
677 a Heliconiini egg; (g-h) *Agraulis vanillae vanillae*, host of both new *Trichogramma* species;  
678 (i-j) *Heliconius hecale melicerta*, on which a *T. soberania* sp. nov. wasp was found.

679

680

681

682

683

684

685

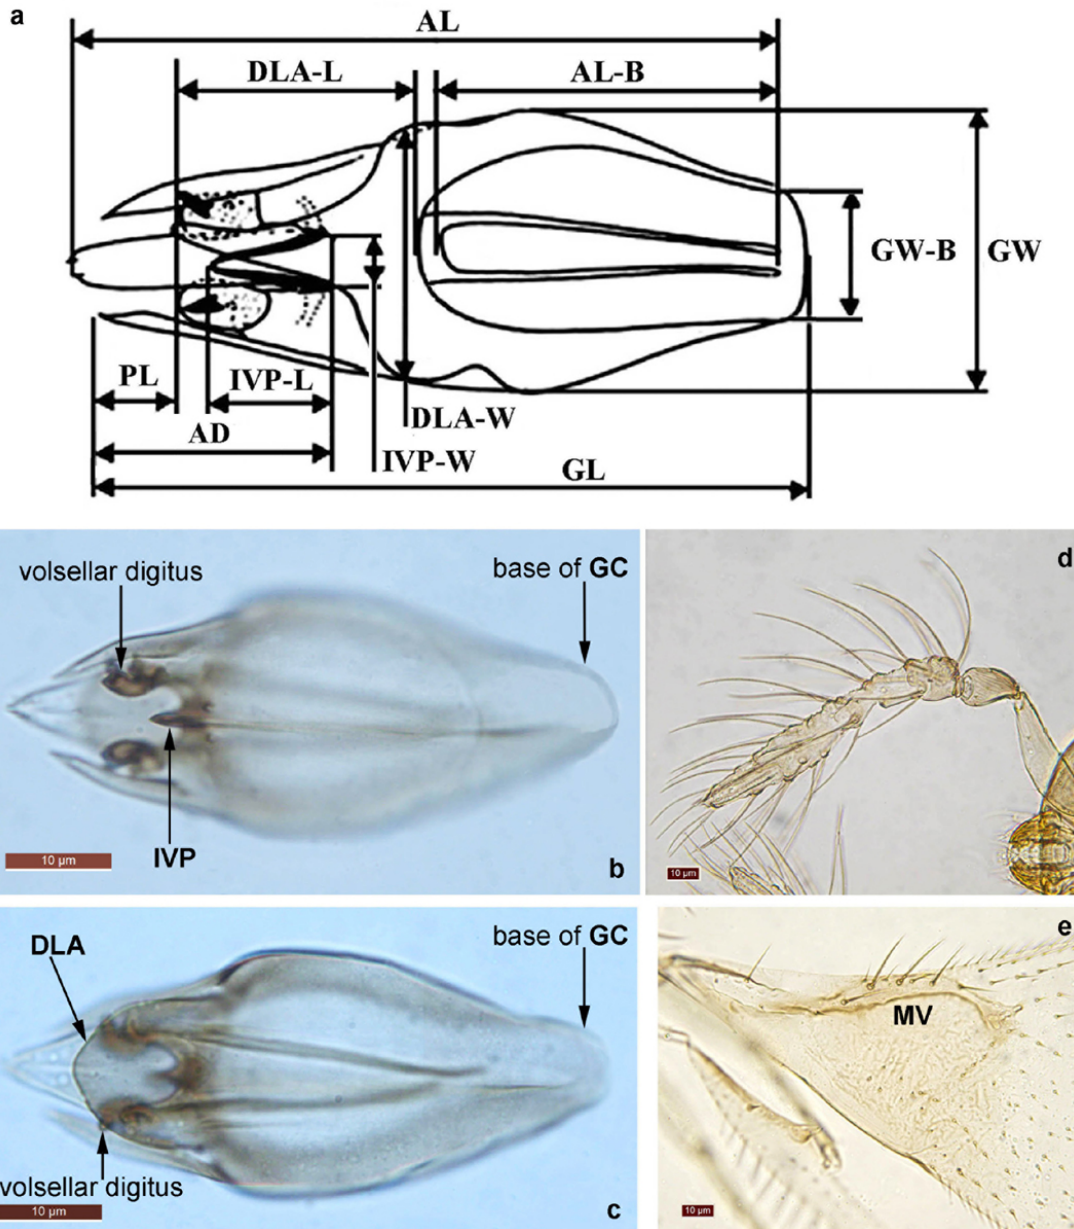

**Figure 2.** *Trichogramma chagres* sp. nov., holotype male: (a) structures of male genitalia with abbreviations of measurements (explanation in text); (b) genitalia, ventral view; (c) genitalia, dorsal view; (d) antenna; (e) veins of fore wing.

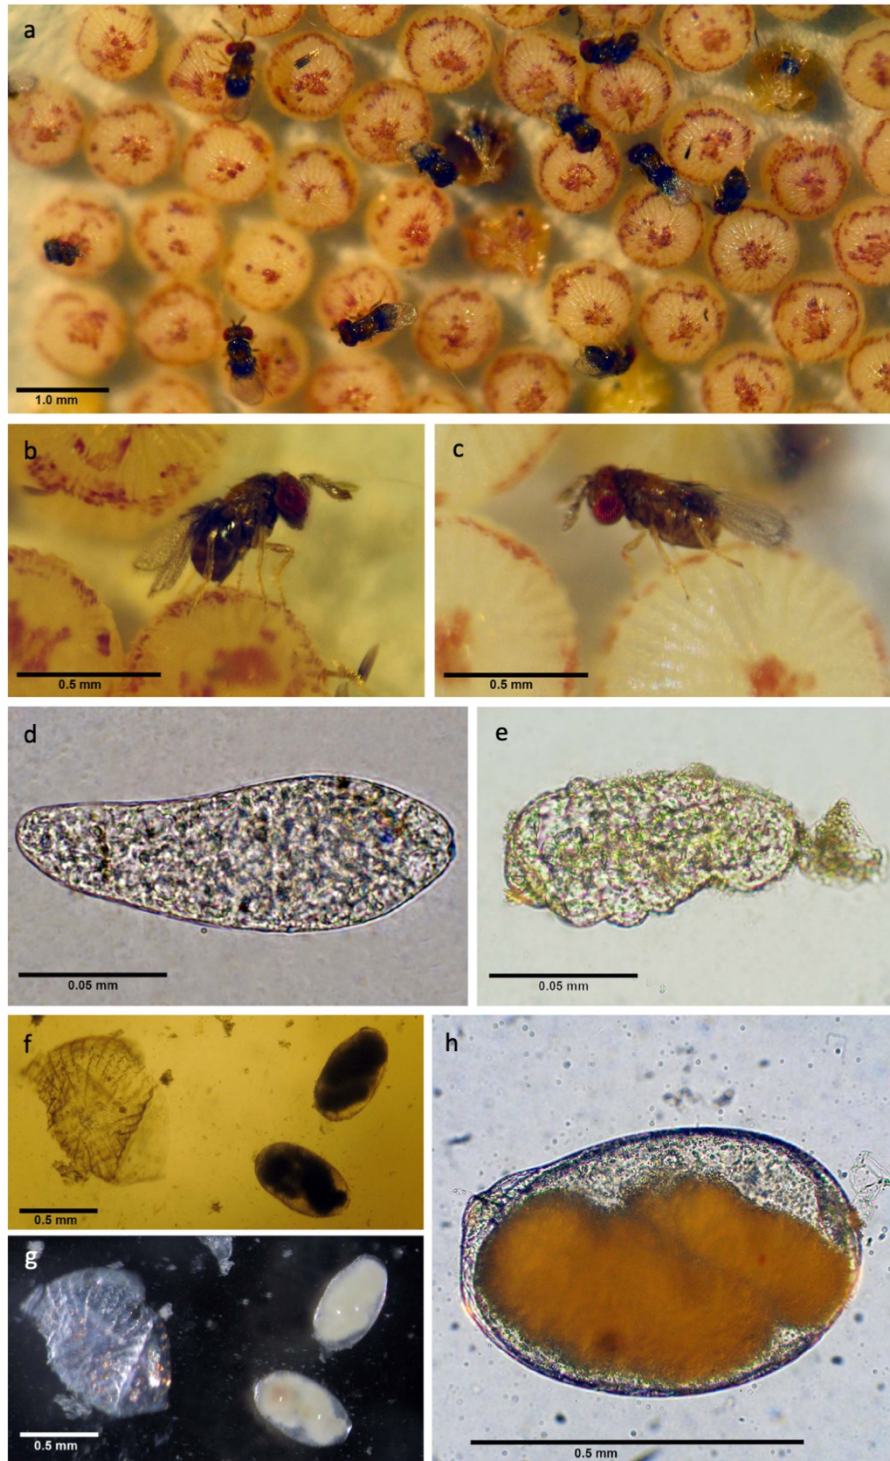

691

692 **Figure 3.** Biology of *Trichogramma chagres* sp. nov. strain L21: (a-c) female adult(s)  
693 parasitizing egg(s) of *Mamestra brassicae*; (d) freshly laid wasp egg; (e) newly hatched larva;  
694 (f-h) mature larva: (f-g) two mature larvae and chorion of consumed host egg in direct (f) and  
695 reflected (g) light, (h) habitus of mature larva with pulsing mid gut full of host egg yolk.



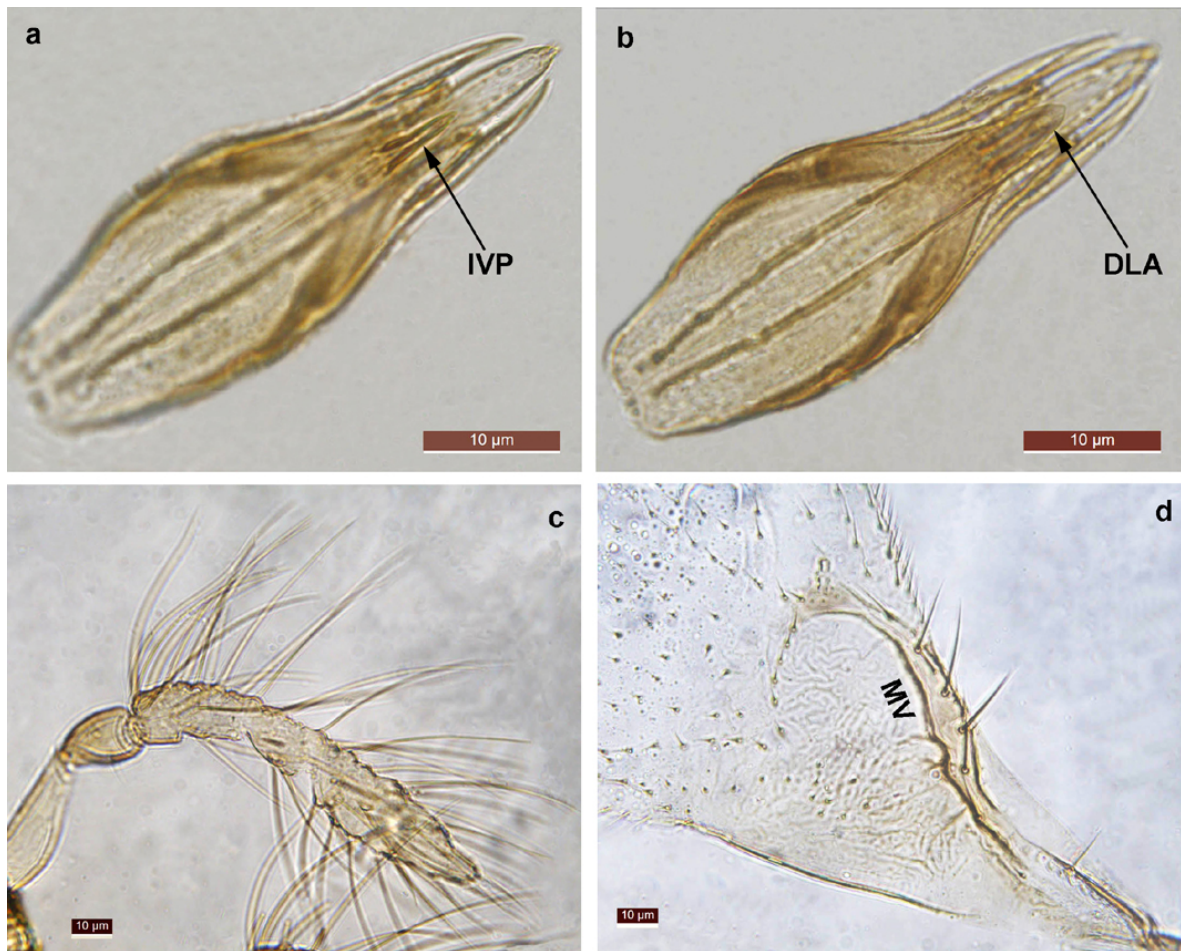

696

697 **Figure 4.** *Trichogramma soberania* sp. nov., holotype male (a) genitalia, ventral view; (b)

698 genital, dorsal view; (c) antenna; (d) veins of fore wing.

699

700

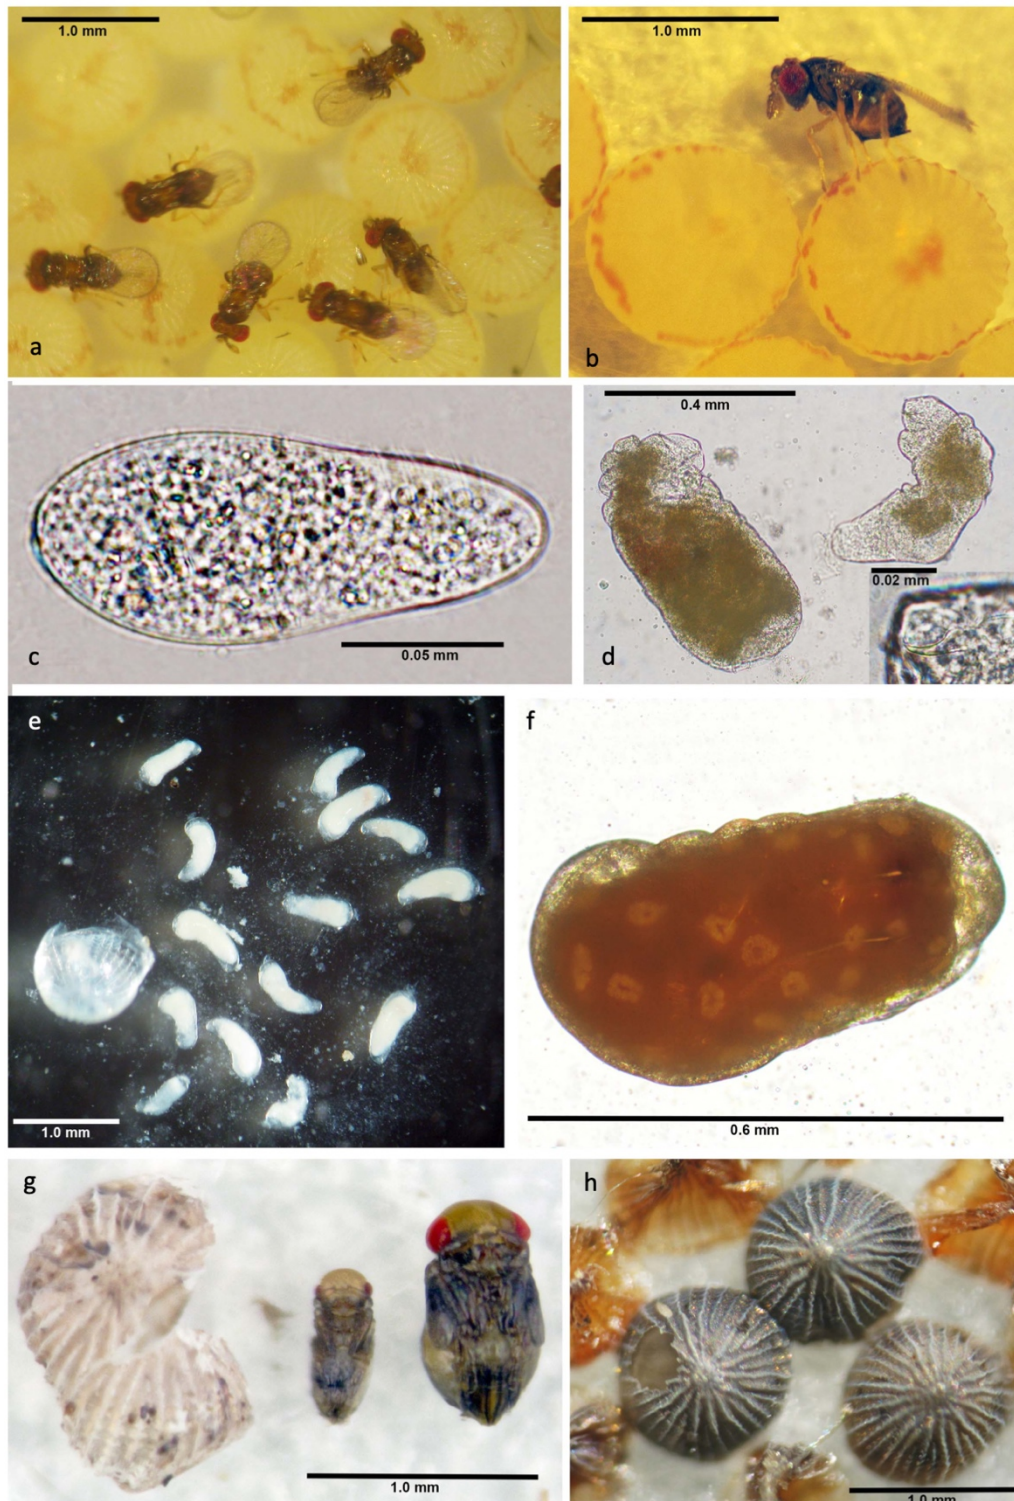

701

702 **Figure 5.** Biology of *Trichogramma soberania* sp. nov. strain L20 (a-b) female adult(s)

703 parasitizing egg(s) of *Mamestra brassicae*; (c) freshly laid wasp egg; (d) 48 h larva; (e) 14

704 larvae can develop inside a *M. brassicae* egg; (f) fully-grown larva; (g) male and female

705 pupae; (h) *Mamestra brassicae* eggs turn black after consumption or parasitism.

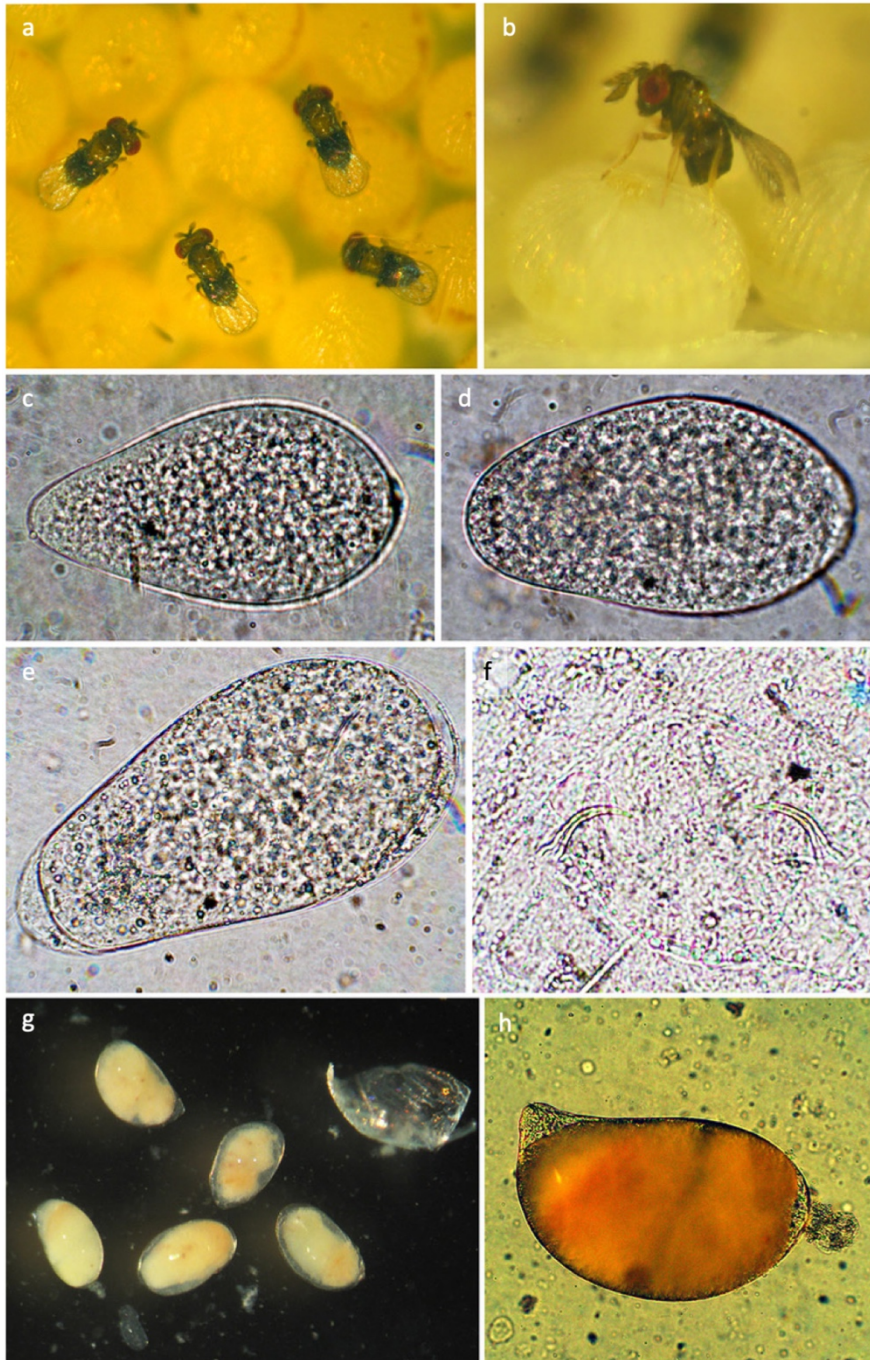

706

707 **Figure S1.** Biology of *Trichogramma chagres* sp. nov. strain L31 (a-b) female adult(s)  
708 parasitizing egg(s) of *Mamestra brassicae*; (c-e) eggs: (c) freshly laid egg; (d) developing  
709 egg; (e) egg with embryo inside; (f) mandibles of larva; (g) mature larvae isolated from  
710 consumed host egg and the egg's chorion; (h) habitus of mature larva with pulsing mid gut  
711 full of host egg yolk.
